# Supplementary material for: De novo reconstruction of the Toxoplasma gondii transcriptome improves on the current genome annotation and reveals alternatively spliced transcripts and putative long non-coding RNAs
Source: PubMed Central journal article supplement (PMC3543268; doi:10.1186/1471-2164-13-696), 2012-12-12

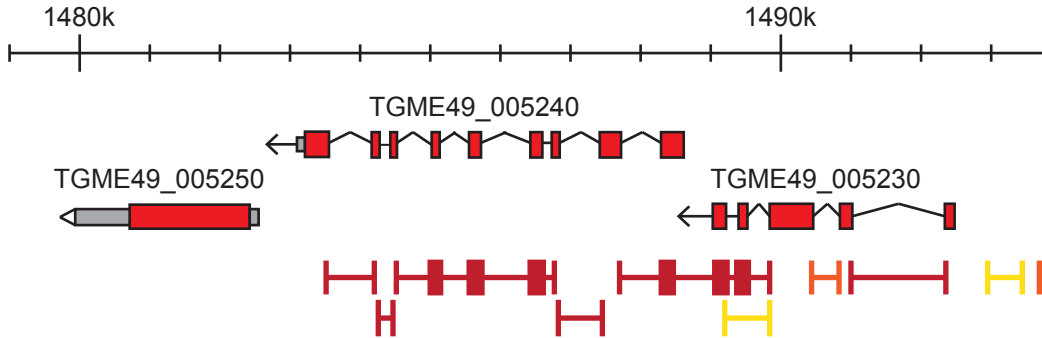

Supplement: 1471-2164-13-696-S6.pdf [file 1471-2164-13-696-S6.pdf]
